# Supplementary material for: Host–guest molecular doping guide for emissive organic semiconductor crystals
Source: Royal Society of Chemistry journal article supplement (doi:10.1039/d2nj03916h), 2022-01-01
Supplement: d2nj03916h1.pdf [file d2nj03916h1.pdf]

# Electronic Supplementary Information

## Molecular Doping Guide for Emissive Organic Semiconductor Crystals

Anatoly D. Kuimov, Christina S. Becker, Alina A. Sonina, and Maxim S. Kazantsev

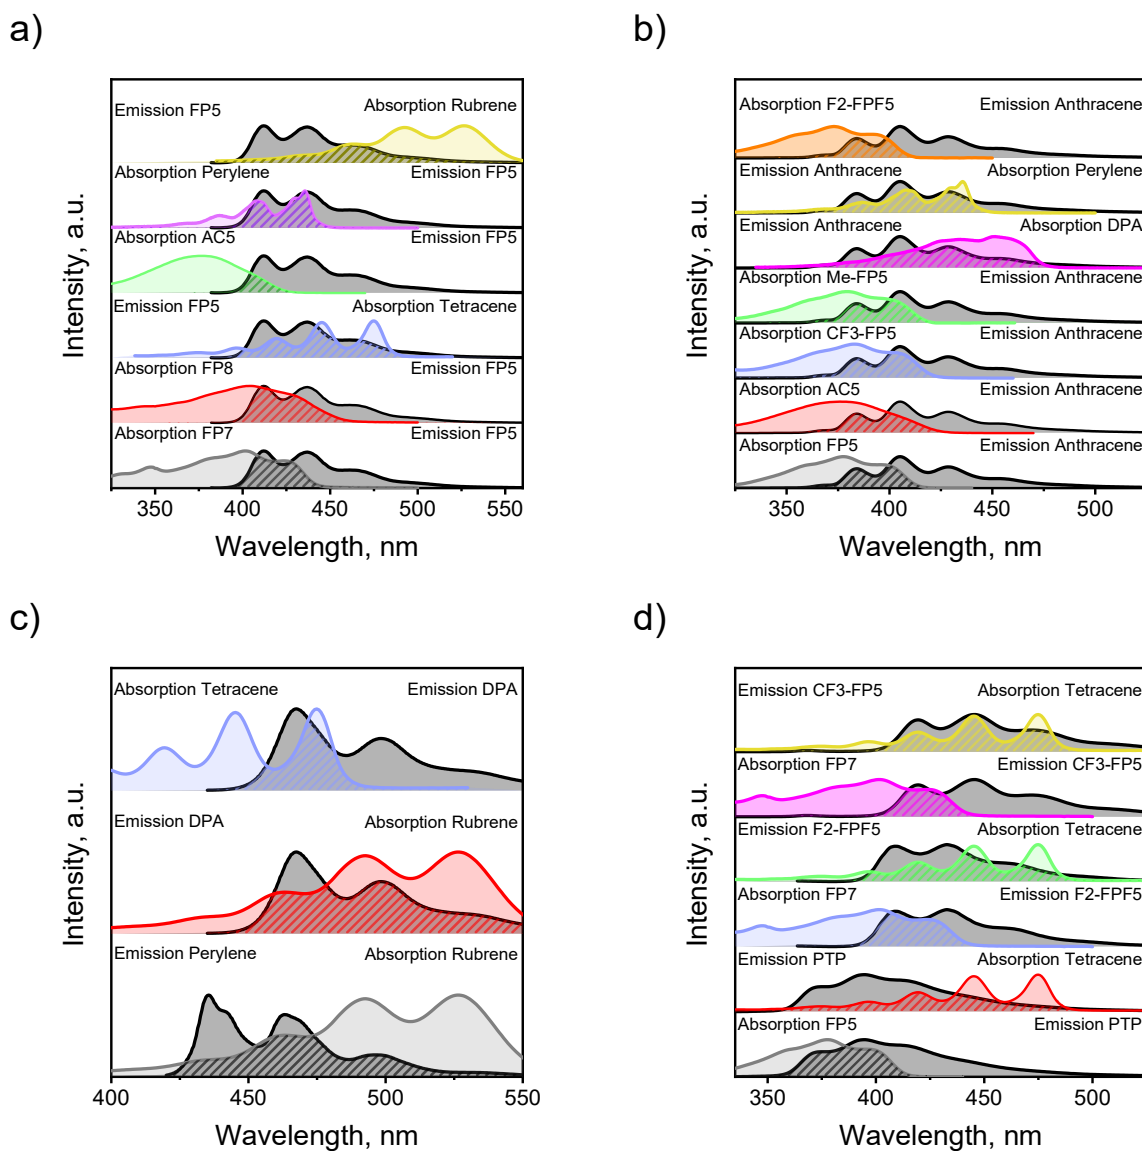

**Figure S1.** The overlap of the host PL and dopant absorption spectra in THF solution ( $10^{-5}\text{M}$ ). The corresponding compound names and abbreviations are shown in the plots.

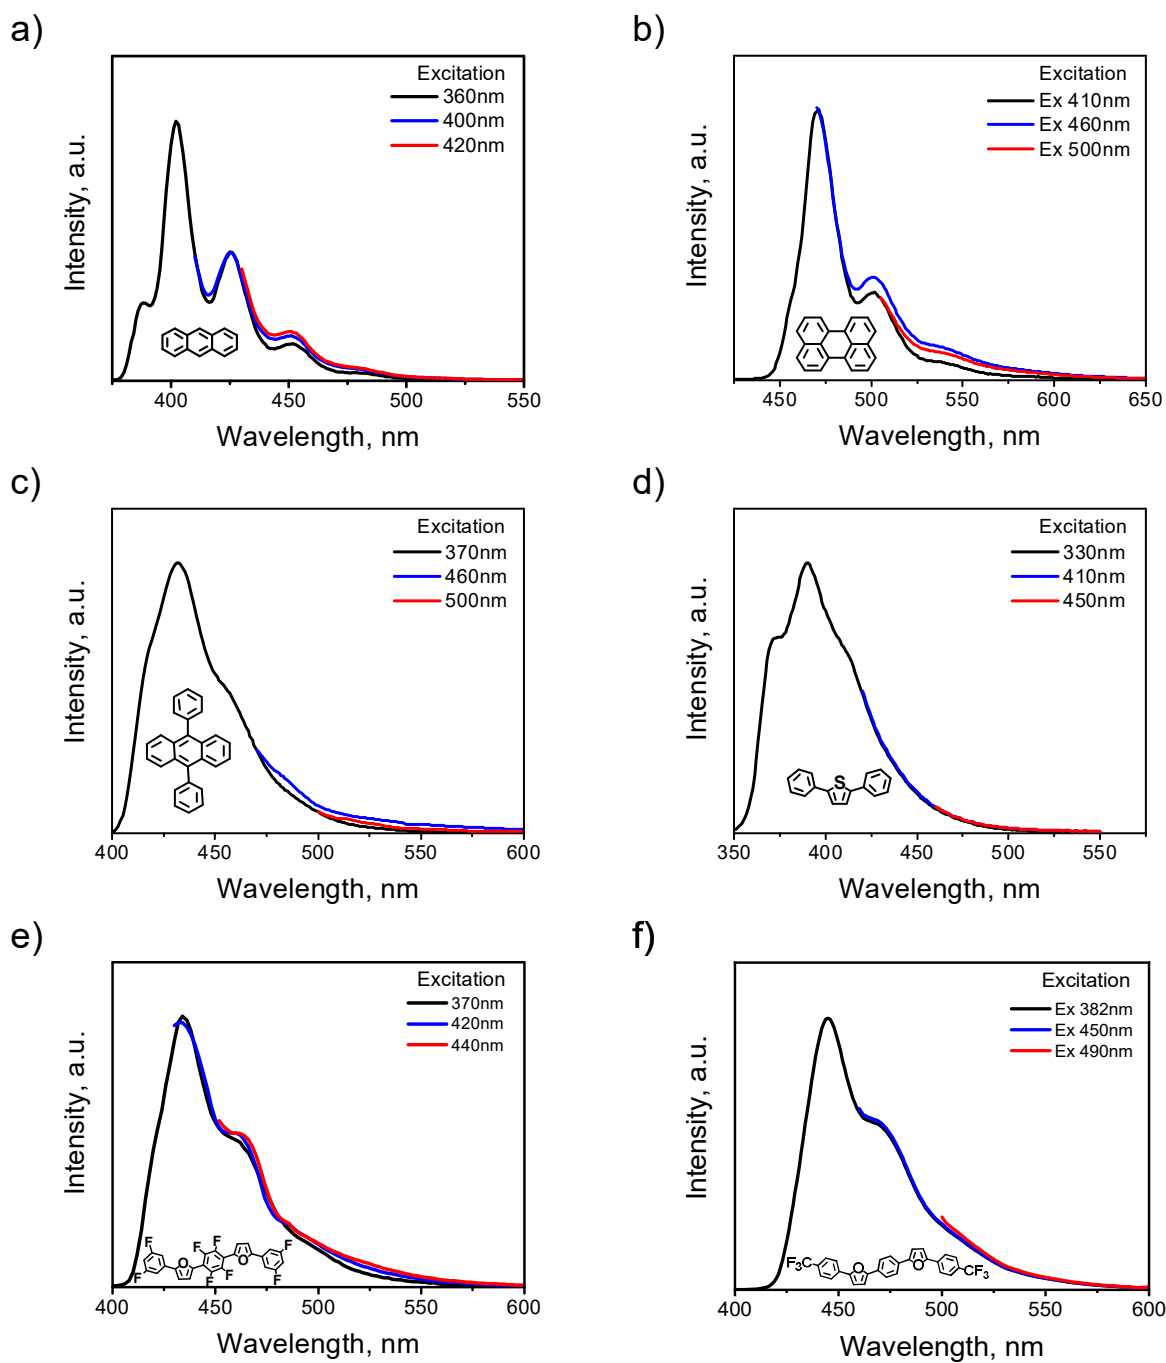

**Figure S2.** PL spectra of  $10^{-3}$  M solutions of host materials with the excitation at the red flange of absorption spectra (excitation wavelengths shown in the plots).

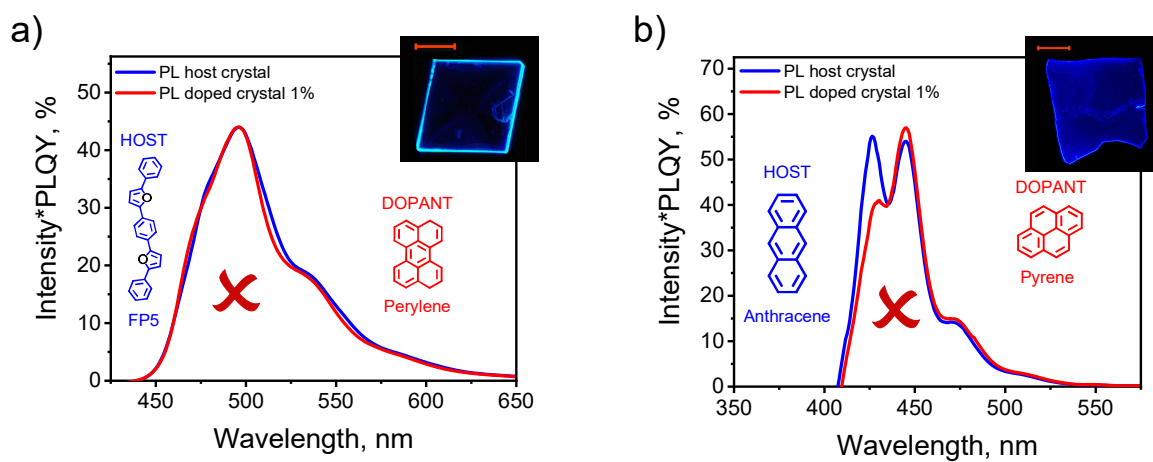

**Figure S3.** PL spectra of pure crystals (blank experiment, blue) and doped crystals (red) normalized to PLQY; the chemical structures and corresponding concentrations demonstrated in the plots; the insets demonstrate the fluorescent optical images of the crystals; the scale bar corresponds to 200  $\mu\text{m}$ .

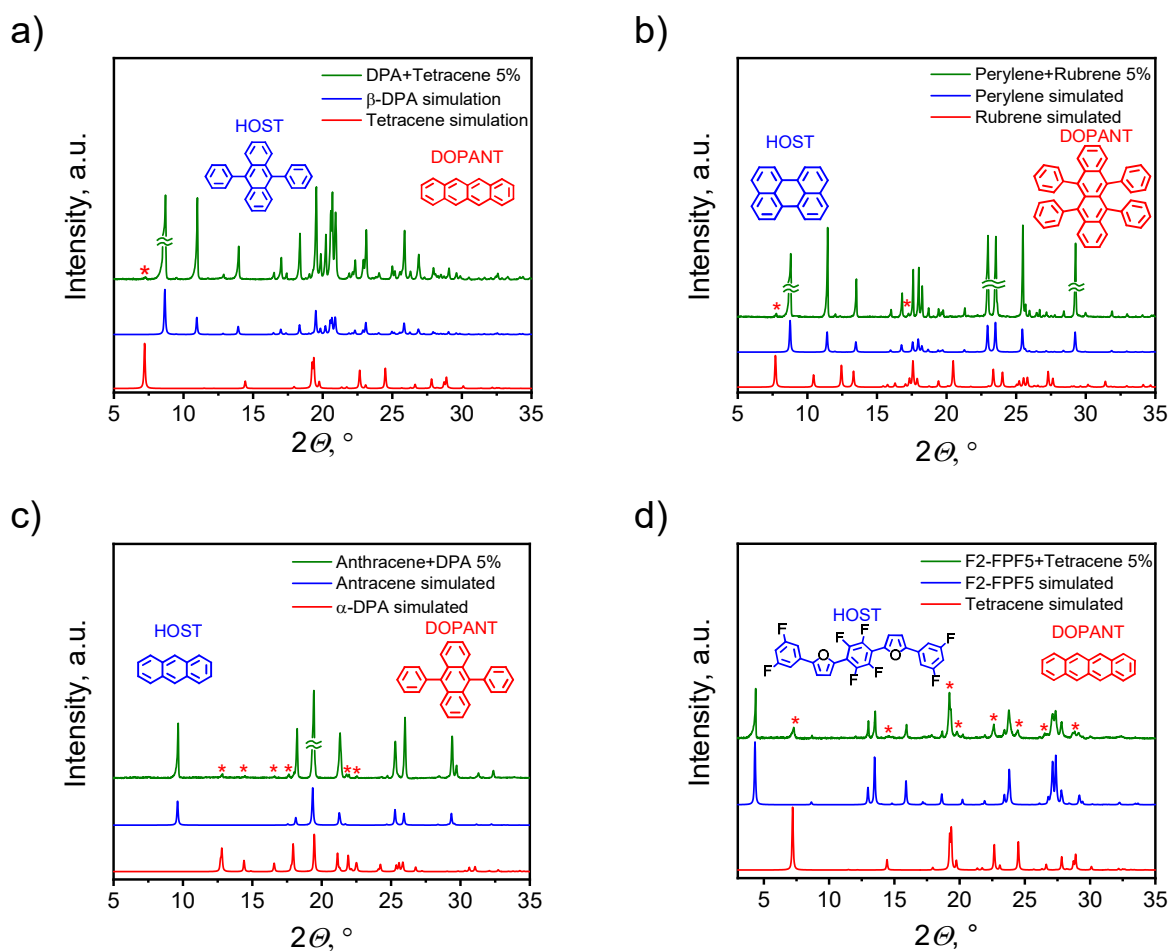

**Figure S4.** Powder X-ray diffraction patterns of crystallized incompatible materials with 5% dopant concentration (olive) in comparison with single-crystal simulation data of host (blue) and dopant (red). Asterisks demonstrate the peaks of a dopant phase distinguishable on the background of host material; chemical structures and corresponding concentrations demonstrated in the plots.
